# Supplementary material for: Crystal structure of a DNA aptamer bound to PvLDH elucidates novel single-stranded DNA structural elements for folding and recognition
Source: PubMed Central journal article supplement (PMC5057103; doi:10.1038/srep34998), 2016-10-11
Supplement: srep34998-s1.pdf [file srep34998-s1.pdf]

## Supplementary Information

### Crystal structure of a DNA aptamer bound to PvLDH elucidates novel single-stranded DNA structural elements for folding and recognition

Sung-Jin Choi & Changill Ban\*

Department of Chemistry, Pohang University of Science and Technology (POSTECH), Pohang, 790-784, South Korea

\*[Correspondence and requests for materials should be addressed to C. Ban \(email: ciban@postech.ac.kr\)](mailto:ciban@postech.ac.kr)

### SUPPLEMENTARY FIGURES

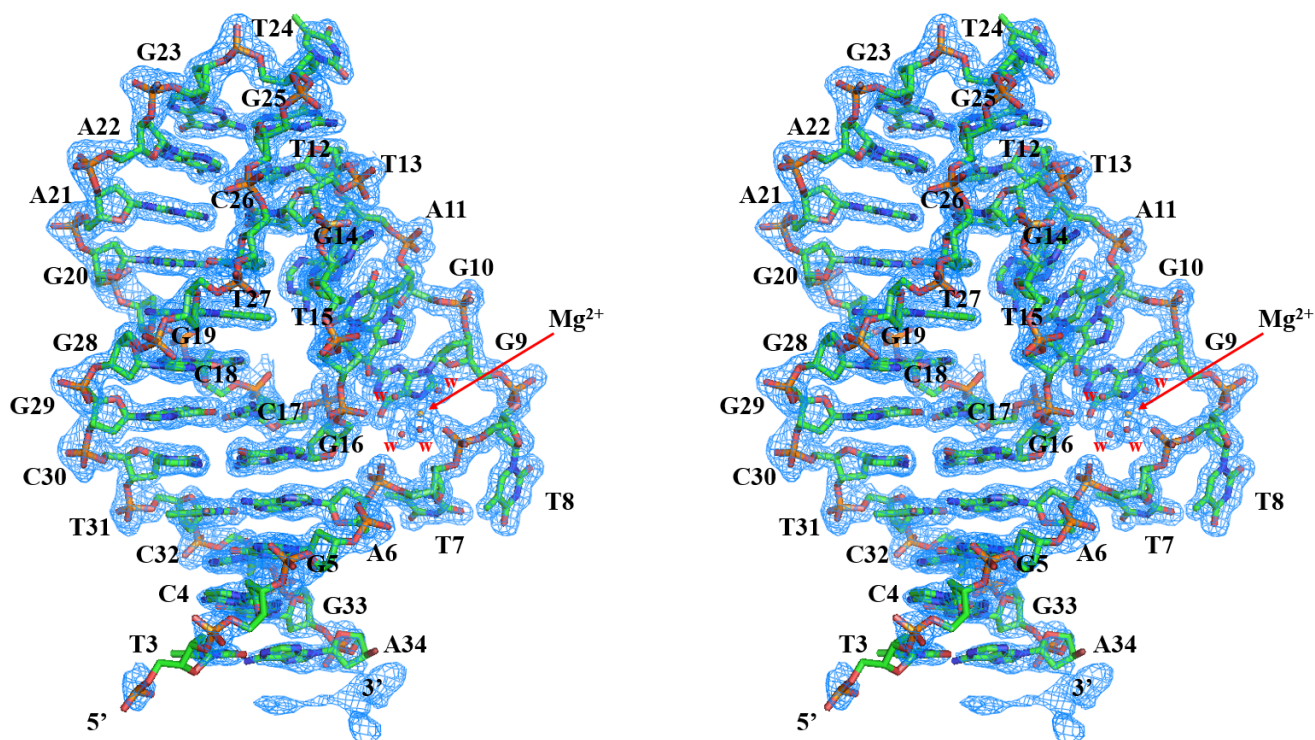

**Supplementary Figure S1.** The  $2mFo-DFc$  electron density map of a hydrated magnesium ion-bound pL1 contoured at  $1.0 \sigma$  is shown as a cyan mesh (Wall-eyed stereo images). pL1, magnesium ion and inner-sphere waters are shown as cyan stick, gold sphere and red spheres, respectively.

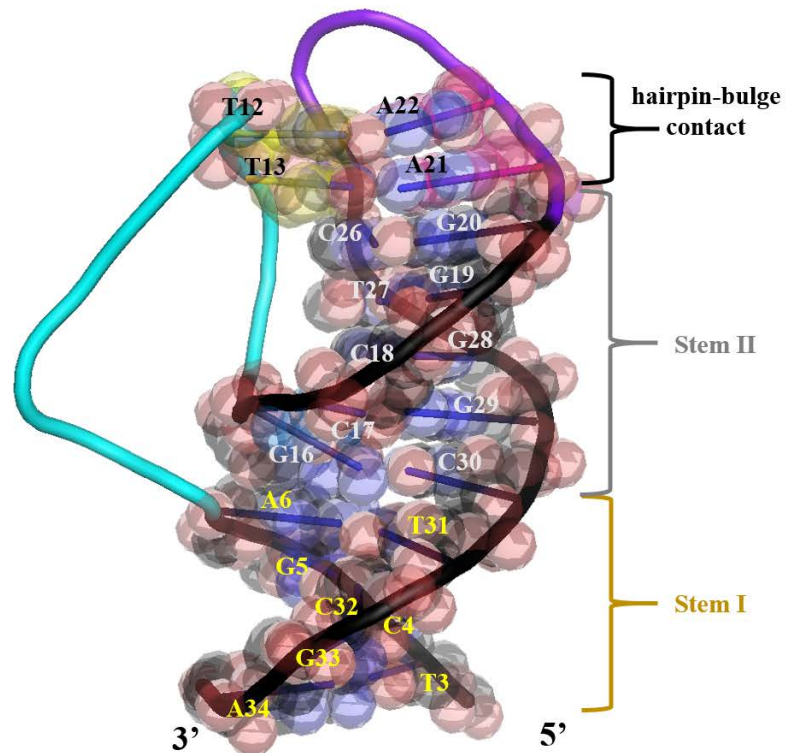

**Supplementary Figure S2. One pseudo-continuous helix is formed from three stems by base stacking.** Strands forming the bulge, hairpin loop, and stems are shown in cyan, purple, and black, respectively. Single letter codes of nucleotides at Stem I, Stem II, and the hairpin-bulge contact are colored in yellow, grey, and black, respectively.

A

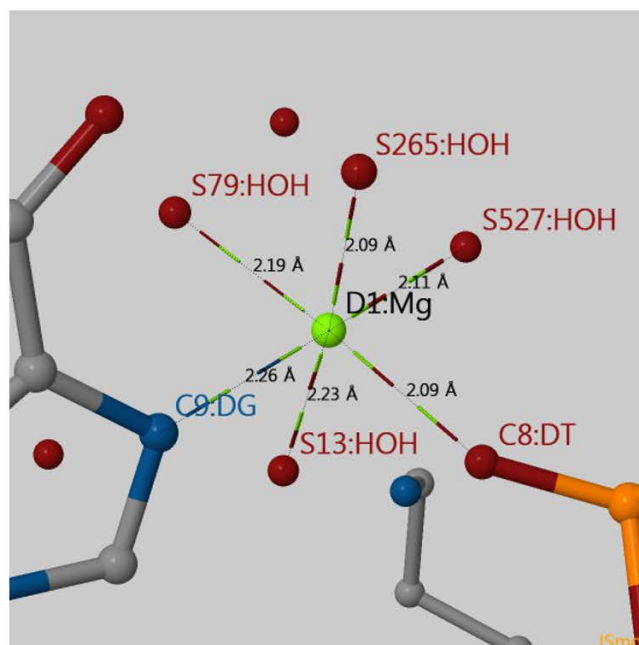

B

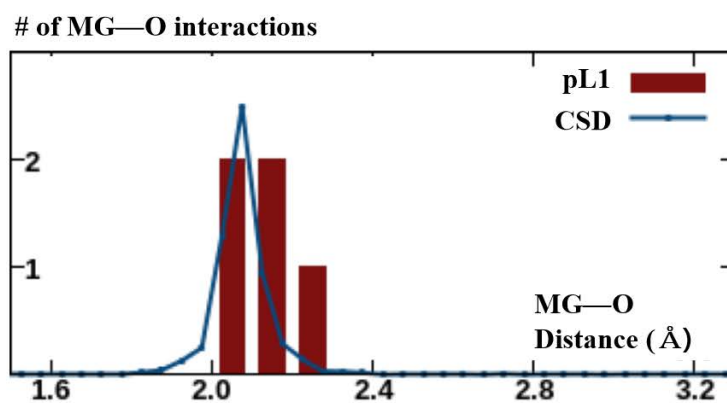

CSD: Cambridge Structural Database

**Supplementary Figure S3. Mg—O distance and validation of the magnesium ion-binding site for pL1 (PDB code: 5HRU) with CheckMyMetal web server.** See also Table S2. (A) Mg—O distance in the inner-sphere of the magnesium ion for pL1 (PDB code: 5HRU) (B) Mg—O distance distribution for pL1 (PDB code: 5HRU) in comparison with CSD.

## Cx Calculation Result

---

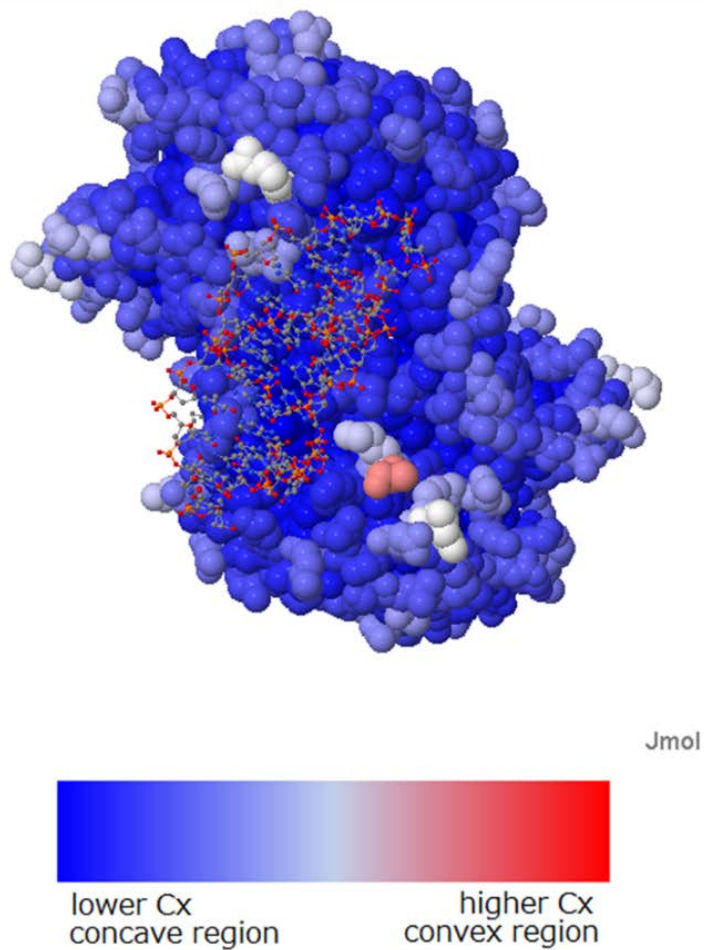

**Supplementary Figure S4. Cx calculation result of *Pv*LDH in complex with pL1.** DNA aptamer pL1 is shown as ball and stick. *Pv*LDH is shown as spheres, with colors corresponding to the Cx values<sup>1</sup>. Blue and red indicate the concave region and convex region, respectively.

A

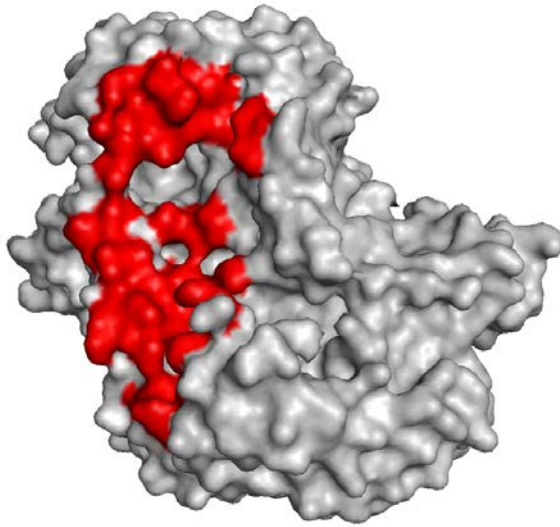

B

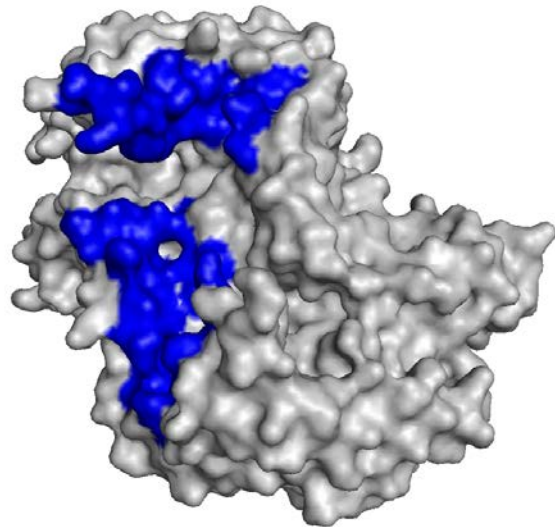

**Supplementary Figure S5. DNA aptamer-contacting residues of *Plasmodium* LDH in the same orientation. (A) Red pL1-contacting residues of *Pv*LDH show a single binding head. (B) Blue 2008s-contacting residues of *Pf*LDH display a double binding head.**

**The additional set of pLDH residues**

|         |                |      |                |     |     |
|---------|----------------|------|----------------|-----|-----|
|         |                | *    |                | 120 |     |
| hLDHA : | RQQEGES        | ---- | RLNLVQRNVNIFK  | :   | 118 |
| hLDHB : | RQQEGES        | ---- | RLNLVQRNVNVEFK | :   | 119 |
| PfLDH : | TKAPCKSDKEWNRD | DL   | PLNNKIMI       | :   | 107 |
| PvLDH : | TKAPCKSDKEWNRD | DL   | PLNNKIMI       | :   | 107 |
|         | G S            | -    | R 1L6          | N 6 |     |

Apo-*Pv*LDH  
 Apo-*Pf*LDH  
 pL1-bound *Pv*LDH  
 2008a-bound *Pf*LDH

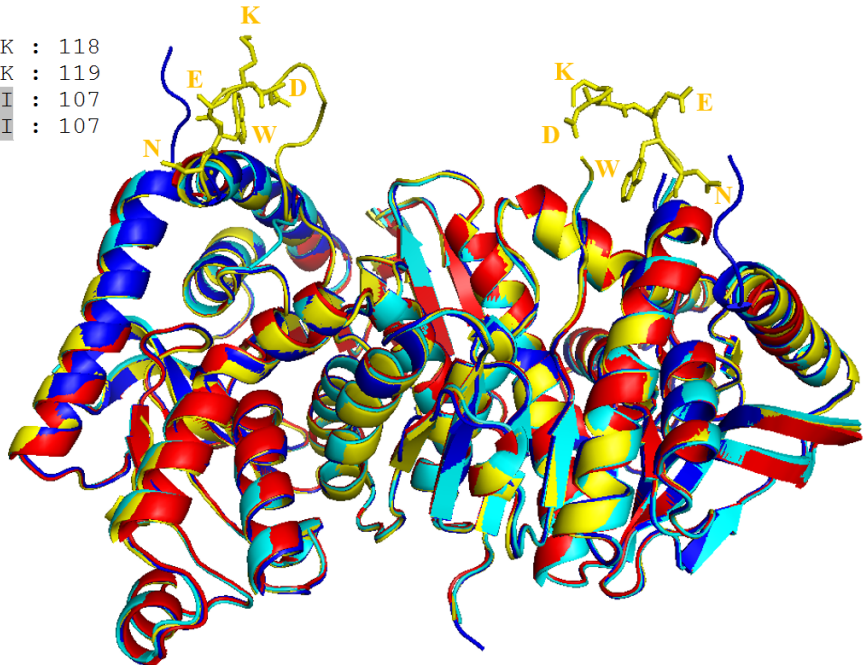

**Supplementary Figure S6. Superimposition of apo-*Pv*LDH (PDB code: 5HS4) with apo-*Pf*LDH (PDB code: 2X8L), pL1-bound *Pv*LDH (PDB code: 5HRU), and 2008s-bound *Pf*LDH (3ZH2).** All proteins are represented as cartoon. Additional residues of pLDH are shown as stick. Apo-*Pv*LDH, apo-*Pf*LDH, pL1-bound *Pv*LDH, and 2008s-bound *Pf*LDH are shown in red, blue, cyan, and yellow, respectively. The loop (FL) containing additional pLDH amino acids is disordered in apo-*Pv*LDH, apo-*Pf*LDH and pL1-bound *Pv*LDH.

(A)

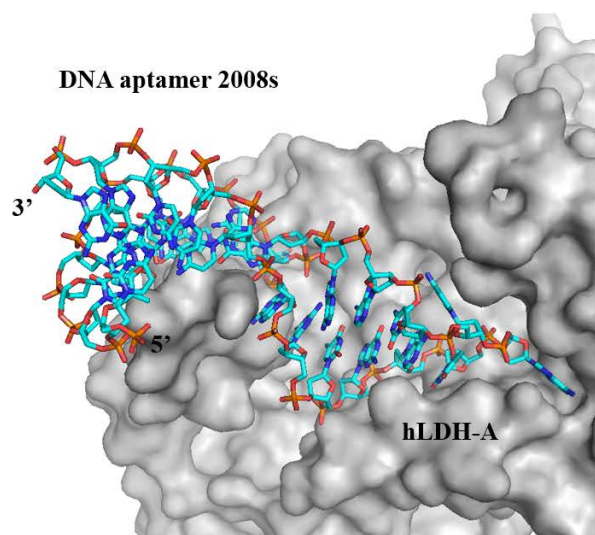

(B)

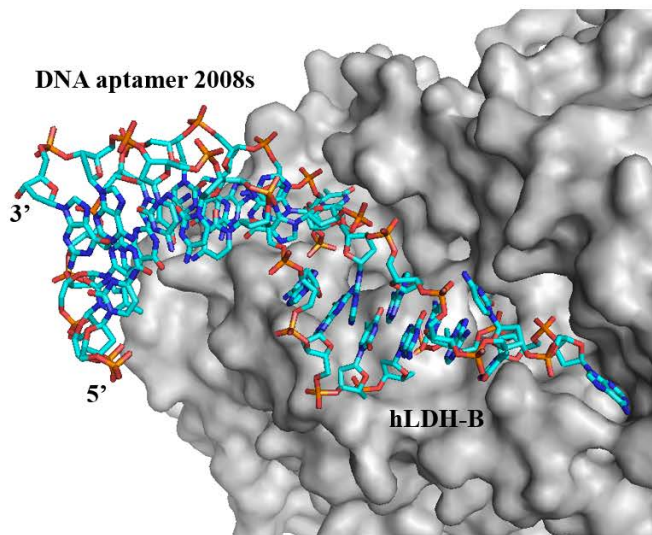

**Supplementary Figure S7. Shape complementarity between 2008s and hLDH.** No steric clashes are observed between 2008s and hLDH. (A) Superimposition of the 2008s:*Pf*LDH complex with hLDH-A (PDB code: 4OJN). (B) Superimposition of the 2008s:*Pf*LDH complex with hLDH-B (PDB code:1T2F).

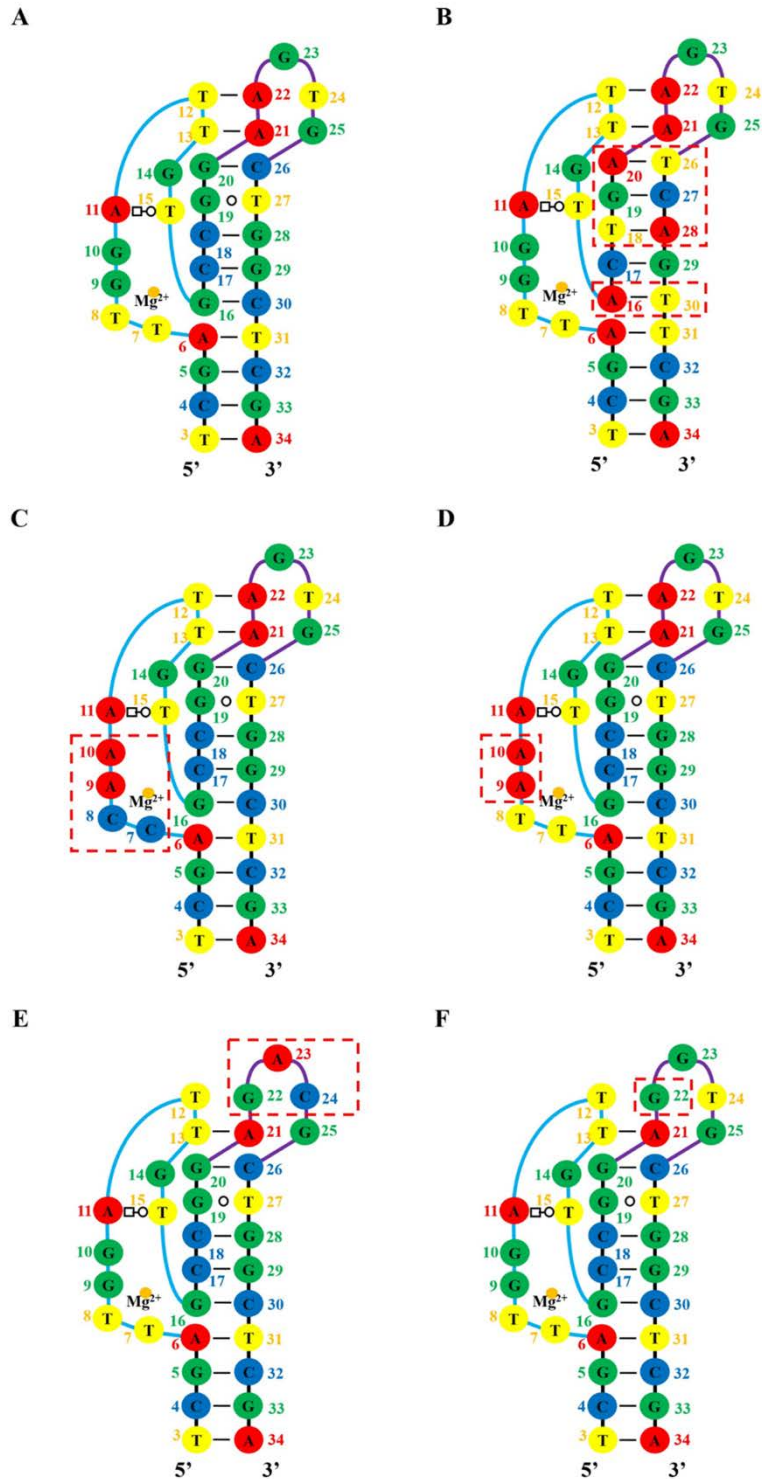

**Supplementary Figure S8. Secondary structures of pL1 mutants derived from the tertiary structure of pL1 and mfold web server<sup>2</sup>.** Altered nucleotides from pL1 are boxed with a dashed red line. (A) Secondary structure of pL1 derived from the tertiary structure of pL1. (B) Secondary structure of the G-C rich stem mutant. (C) Secondary structure of the loop 1 mutant. (D) Secondary structure of the bulge mutant. (E) Secondary structure of the loop 2 mutant. (F) Secondary structure of the hairpin loop mutant.

## SUPPLEMENTARY TABLES

**Supplementary Table S1. Crystallographic data collection and refinement statistics.** Statistics for the highest-resolution shell are shown in parentheses. Ramachandran plot statistics were calculated by RAMPAGE web server.

|                                                     | Apo- <i>Pv</i> LDH        | pL1: <i>Pv</i> LDH<br>(dimeric)          | pL1: <i>Pv</i> LDH<br>(tetrameric)                    |
|-----------------------------------------------------|---------------------------|------------------------------------------|-------------------------------------------------------|
| <b>Data collection</b>                              |                           |                                          |                                                       |
| Space group                                         | <i>I</i> 222              | <i>P</i> 4 <sub>1</sub> 2 <sub>1</sub> 2 | <i>P</i> 2 <sub>1</sub> 2 <sub>1</sub> 2 <sub>1</sub> |
| Cell dimensions                                     |                           |                                          |                                                       |
| a, b, c (Å)                                         | 75.7, 80.6, 93.3          | 84.5, 84.5, 209.9                        | 85.5, 86.5, 209.1                                     |
| $\alpha$ , $\beta$ , $\gamma$ (°)                   | 90.0, 90.0, 90.0          | 90.0, 90.0, 90.0                         | 90.0, 90.0, 90.0                                      |
| Resolution (Å)                                      | 23.77-1.33<br>(1.38-1.33) | 24.96-1.71<br>(1.73-1.71)                | 25.00-1.90<br>(1.96-1.90)                             |
| <i>R</i> <sub>merge</sub>                           | 0.07 (0.26)               | 0.10 (0.28)                              | 0.08 (0.26)                                           |
| Mean <i>I</i> / $\sigma$ ( <i>I</i> )               | 43.64 (11.18)             | 49.31 (11.41)                            | 45.27 (14.84)                                         |
| Completeness (%)                                    | 99.0 (95.8)               | 99.8 (99.3)                              | 99.9 (99.23)                                          |
| Redundancy                                          | 11.8 (9.0)                | 21.4 (15.4)                              | 14.6 (14.4)                                           |
| <b>Refinement</b>                                   |                           |                                          |                                                       |
| No. unique reflections                              | 63,845 (6,093)            | 82,462 (8,064)                           | 122,577 (12,020)                                      |
| <i>R</i> <sub>work</sub> / <i>R</i> <sub>free</sub> | 0.14 / 0.17               | 0.15 / 0.18                              | 0.17 / 0.20                                           |
| No. atoms                                           |                           |                                          |                                                       |
| Protein                                             | 2292                      | 4634                                     | 9202                                                  |
| DNA / ion                                           | N/A                       | 663 / 1                                  | 1203 / 2                                              |
| Water                                               | 223                       | 526                                      | 903                                                   |
| Wilson <i>B</i> -factor                             | 13.6                      | 20.3                                     | 17.9                                                  |
| <i>B</i> -factors                                   |                           |                                          |                                                       |
| Overall                                             | 17.8                      | 24.5                                     | 20.1                                                  |
| Protein                                             | 17.0                      | 21.7                                     | 17.3                                                  |
| DNA / ion                                           | N/A                       | 37.2 / 19.5                              | 31.9 / 19.6                                           |
| Water                                               | 26.1                      | 29.7                                     | 23.7                                                  |
| r.m.s. deviations                                   |                           |                                          |                                                       |
| Bond lengths (Å)                                    | 0.008                     | 0.008                                    | 0.009                                                 |
| Bond angles (°)                                     | 1.16                      | 1.12                                     | 1.12                                                  |
| <b>Ramachandran plot</b>                            |                           |                                          |                                                       |
| Favored (%)                                         | 97.7                      | 97.8                                     | 97.8                                                  |
| Allowed (%)                                         | 2.0                       | 1.8                                      | 1.8                                                   |
| Outlier (%)                                         | 0.3                       | 0.3                                      | 0.3                                                   |



**Supplementary Table S2. Validation of the magnesium-binding site in pL1 via the CheckMyMetal web server.** See also Fig. S3. All descriptions of CheckMyMetal parameters are taken from CheckMyMetal web server. All parameters are acceptable for the magnesium ion-binding site without alternative metal ions and bidentate.

| ID      | Res. | Metal | Occupancy      | <i>B</i> factor (env.) <sup>3</sup> | Ligands                       | Valence <sup>4</sup> | <i>nVECSU</i> M <sup>5</sup> | Geometry <sup>3,6</sup> | <i>gRMSD</i> (°) <sup>3</sup> | Vacancy <sup>3</sup> | Bidentate | Alt. metal |
|---------|------|-------|----------------|-------------------------------------|-------------------------------|----------------------|------------------------------|-------------------------|-------------------------------|----------------------|-----------|------------|
| D:1     | MG   | Mg    | 1              | 19.6 (20.9)                         | O <sub>5</sub> N <sub>1</sub> | 1.7                  | 0.052                        | Octahedra<br>1          | 2.5°                          | 0                    | 0         |            |
| Legend: |      |       | Not applicable |                                     | Outlier                       |                      |                              | Borderline              |                               | Acceptable           |           |            |

| Column                              | Description                                                                                                                                                                                                                            |
|-------------------------------------|----------------------------------------------------------------------------------------------------------------------------------------------------------------------------------------------------------------------------------------|
| <i>Occupancy</i>                    | Occupancy of ion under consideration.                                                                                                                                                                                                  |
| <i>B</i> factor (env.) <sup>3</sup> | Metal ion B factor, with valence-weighted environmental average B factor in parenthesis.                                                                                                                                               |
| <i>Ligands</i>                      | Elemental composition of the coordination sphere.                                                                                                                                                                                      |
| <i>Valence</i> <sup>4</sup>         | Summation of bond valence values for an ion binding site. <i>Valence</i> accounts for metal-ligand distances.                                                                                                                          |
| <i>nVECSUM</i> <sup>5</sup>         | Summation of ligand vectors, weighted by bond valence values and normalized by overall valence. Increase when the coordination sphere is not symmetrical due to incompleteness.                                                        |
| <i>Geometry</i> <sup>3,6</sup>      | Arrangement of ligands around the ion, as defined by the <i>NEIGHBORHOOD</i> algorithm.                                                                                                                                                |
| <i>gRMSD</i> (°) <sup>3</sup>       | R.M.S. Deviation of observed geometry angles (L-M-L angles) compared to ideal geometry, in degrees.                                                                                                                                    |
| <i>Vacancy</i> <sup>3</sup>         | Percentage of unoccupied sites in the coordination sphere for the given geometry.                                                                                                                                                      |
| Bidentate                           | Number of residues that form a bidentate interaction instead of being considered as multiple ligands.                                                                                                                                  |
| Alt. metal                          | A list of alternative metal(s) is proposed in descending order of confidence, assuming metal environment is accurately determined. This feature is still experimental. It requires user discrimination and cannot be blindly accepted. |

**Supplementary Table S3. Interactions between pLDH and DNA aptamers within 4 Å.** Red residues are involved in salt bridge interactions. Bold protein residues are implicated in the recognition of both 2008s and pL1.

|                              | <i>Pv</i> LDH:pL1<br>(5HRU)                                                                                                                                                                                                                                                                                                                                                                                                                                                                                                                            |                                                                                                                                                                                                                                                                     | <i>Pf</i> LDH:2008s<br>(3ZH2)                                                                                                                                                                                                                                                                                                                                                                                                                                                                                                                                                                                                    |                                                                                                                                                                                                                                                                                                                                                                                       |
|------------------------------|--------------------------------------------------------------------------------------------------------------------------------------------------------------------------------------------------------------------------------------------------------------------------------------------------------------------------------------------------------------------------------------------------------------------------------------------------------------------------------------------------------------------------------------------------------|---------------------------------------------------------------------------------------------------------------------------------------------------------------------------------------------------------------------------------------------------------------------|----------------------------------------------------------------------------------------------------------------------------------------------------------------------------------------------------------------------------------------------------------------------------------------------------------------------------------------------------------------------------------------------------------------------------------------------------------------------------------------------------------------------------------------------------------------------------------------------------------------------------------|---------------------------------------------------------------------------------------------------------------------------------------------------------------------------------------------------------------------------------------------------------------------------------------------------------------------------------------------------------------------------------------|
|                              | Protein residues                                                                                                                                                                                                                                                                                                                                                                                                                                                                                                                                       | Aptamer residues                                                                                                                                                                                                                                                    | Protein residues                                                                                                                                                                                                                                                                                                                                                                                                                                                                                                                                                                                                                 | Aptamer residues                                                                                                                                                                                                                                                                                                                                                                      |
| Hydrogen bonding interaction | <p><b>Lys44 (NZ) chain B</b><br/>Gly81 (N) chain B<br/>Thr83 (O) chain A</p> <p>Tyr236 (OH) chain A</p>                                                                                                                                                                                                                                                                                                                                                                                                                                                | <p><b>G10 (OP1)</b><br/>T8 (O3')<br/>G23 (N1, N2)</p> <p>A11 (OP1)</p>                                                                                                                                                                                              | <p>Asp35 (OD1) chain A<br/>Ile36 (N) chain A<br/><b>Lys44 (NZ) chain B</b></p> <p><b>Lys84 (NZ) chain A</b><br/>Ala85 (O) chain A<br/><b>Lys88 (NZ) chain A</b><br/>Lys88 (N) chain A<br/>Ser89 (N) chain A<br/>Ser89 (OG) chain A<br/>Asp90 (OD1) chain A<br/>Asp90 (OD2) chain A<br/><b>His232 (ND1) chain A</b></p>                                                                                                                                                                                                                                                                                                           | <p>T9 (N3)<br/>T9 (O4)<br/><b>A18 (OP1)</b></p> <p><b>A10 (OP2)</b>, A22 (N1)<br/>A22 (N6)<br/><b>A22 (OP2)</b><br/>G11 (N7)<br/>G11 (O6)<br/>G11 (O6), C6 (N4)<br/>G7 (N1)<br/>G7 (N2), G8 (N2)<br/>T17 (O2)</p>                                                                                                                                                                     |
| Interacting residues         | <p>Gly11 chain B<br/><b>Gly13 chain B</b><br/><b>Met14 chain A; B</b></p> <p><b>Asp35 chain B</b><br/><b>Val36 chain A; B</b><br/><b>Val37 chain A; B</b><br/>Lys38 chain B<br/><b>Met40 chain B</b><br/><b>Lys44 chain B</b></p> <p>Thr79 chain B<br/><b>Ala80 chain B</b><br/><b>Gly81 chain A; B</b><br/><b>Phe82 chain A; B</b><br/>Thr83 chain A<br/><b>Lys84 chain A</b></p> <p>Asp97 chain A<br/>Leu98 chain A<br/>Leu101 chain A<br/><b>Ile105 chain A; B</b></p> <p><b>Leu232 chain A</b></p> <p><b>Ser234 chain A</b><br/>Tyr236 chain A</p> | <p>G9<br/>G9, G10<br/>A11; G10</p> <p>G9<br/>T24; T7, T8<br/>T24; G9<br/>T7<br/>G9<br/><b>G10</b></p> <p>G9<br/>G9, T8<br/>T24; T8<br/>G25, T24, G23; T8<br/>T8<br/>G23, T12, G23</p> <p>G23<br/>G23<br/>G23<br/>T24; T8</p> <p>C18, C17, G9</p> <p>A11<br/>A11</p> | <p><b>Gly13 chain B</b><br/><b>Met14 chain B</b><br/>Phe34 chain A<br/><b>Asp35 chain A</b><br/><b>Ile36 chain A; B</b><br/><b>Val37 chain B</b></p> <p><b>Met40 chain B</b><br/><b>Lys44 chain B</b><br/>Tyr67 chain A</p> <p><b>Ala80 chain A; B</b><br/><b>Gly81 chain A; B</b><br/><b>Phe82 chain A; B</b></p> <p><b>Lys84 chain A</b><br/>Ala85 chain A<br/>Pro86 chain A<br/>Gly87 chain A<br/><b>Lys88 chain A</b><br/>Ser89 chain A<br/>Asp90 chain A<br/>Lys91 chain A</p> <p><b>Ile105 chain A; B</b><br/>Glu108 chain B<br/>Val229 chain A<br/><b>His232 chain A</b><br/>Ala233 chain A<br/><b>Ser234 chain A</b></p> | <p>A18, T17<br/>A18<br/>T9<br/>T9<br/>T9; A16<br/>T17</p> <p>T17<br/>T17, <b>A18</b>,<br/>T9</p> <p>T9; A16<br/>T9; A16<br/>T9, A10; A16</p> <p><b>A10</b>, A22, G21<br/>A22<br/>A10, G8, A22<br/>G11, G7, A10, A22<br/>C23, <b>A22</b>, G11<br/>C6, G11, G7, G5, C23<br/>G8, C6, G7<br/>G5, C23, G4</p> <p>T9; A16<br/>A16<br/>T20, G19<br/>T17, <b>G19</b>, A18<br/>G19<br/>G19</p> |

**Supplementary Table S4. Interface properties between proteins and nucleic acids.** The data for protein:RNA, protein:DNA, and protein:protein are taken from a previous interface analysis<sup>7,8</sup>. Protein:DNA aptamer complexes include thrombin:mTBA (PDB code: 3QLP), thrombin:TBA (PDB code: 4DIH), thrombin:RE31 (PDB code: 5CMX), HIV-1 RT:apt-DNA (PDB code: 5I3U), ATX:RB011 (5HRT), *Pf*LDH:2008a (3ZH2), and VWF:ARC1172 (3HXO) complexes. The parameters are described below.  $\Delta$ ASA: Half of the buried ASA ( $\text{\AA}^2$ ) within 5  $\text{\AA}$  upon complex formation was calculated using COCOMAPS web server employing NACCESS. Hydrogen bonds (/100  $\text{\AA}^2$   $\Delta$ ASA): Number of intermolecular hydrogen bonds per  $\text{\AA}^2$   $\Delta$ ASA was calculated using COCOMAPS web server employing NACCESS. Bridging waters (/100  $\text{\AA}^2$   $\Delta$ ASA): Number of water molecules forming hydrogen bonds with both DNA aptamers and proteins per 1000  $\text{\AA}^2$   $\Delta$ ASA was calculated using CANTACT.

|                                                        | Protein:<br>RNA | Protein:<br>DNA | Protein:<br>Protein | Protein:<br>DNA aptamer | <i>Pv</i> LDH:<br>pL1 |
|--------------------------------------------------------|-----------------|-----------------|---------------------|-------------------------|-----------------------|
| No. of complexes                                       | 89              | 115             | 115                 | 7                       | 1                     |
| $\Delta$ ASA                                           | 1230            | 1568            | 943                 | 1008.4                  | 1145                  |
| Bridging waters<br>(/1000 $\text{\AA}^2$ $\Delta$ ASA) | 8.1             | 9.6             | 5.4                 | 2.49                    | 13.9                  |
| No. of complexes                                       | 20              | 29              | 59                  | 7                       | 1                     |
| Hydrogen bonds<br>(/100 $\text{\AA}^2$ $\Delta$ ASA)   | 1.2             | 1.3             | 0.8                 | 1.40                    | 0.4                   |

**Supplementary Table S5. Bridging waters between P<sub>v</sub>LDH and pL1 (PDB code: 5HRU).**

| <b>pL1<br/>Atom (residue)</b> | <b>Distance (Å)<br/>(pL1 to Water)</b> | <b>Water molecule<br/>Number</b> | <b>Distance (Å)<br/>(Water to P<sub>v</sub>LDH)</b> | <b>P<sub>v</sub>LDH<br/>Atom (residue)</b> |
|-------------------------------|----------------------------------------|----------------------------------|-----------------------------------------------------|--------------------------------------------|
| OP2 (C17)                     | 2.69                                   | 5                                | 2.86                                                | O (Lys38 B)                                |
| N7 (G9)                       | 3.15                                   | 13                               | 2.67                                                | NZ (Lys84 B)                               |
| O2 (T8)                       | 2.67                                   |                                  |                                                     |                                            |
| OP1 (T8)                      | 3.11                                   |                                  |                                                     |                                            |
| O2 (T8)                       | 2.67                                   | 19                               | 2.81                                                | OH (Tyr67 B)                               |
| N2 (G9)                       | 2.84                                   | 34                               | 2.65                                                | O (Leu232 A)                               |
| O4' (G10)                     | 2.98                                   |                                  |                                                     |                                            |
| N3 (T8)                       | 2.86                                   | 37                               | 2.77                                                | OH (Tyr67 B)                               |
|                               |                                        |                                  | 2.86                                                | OE1 (Glu108 B)                             |
| OP2 (G9)                      | 3.07                                   | 49                               | 2.96                                                | N (Val36 B)                                |
|                               |                                        |                                  | 3.28                                                | OD1 (Asp35 B)                              |
| OP1 (G9)                      | 2.61                                   | 84                               | 2.89                                                | N (Gly13 B)                                |
|                               |                                        |                                  | 2.70                                                | OG1 (Thr79 B)                              |
| OP2 (T8)                      | 2.74                                   | 99                               | 2.61                                                | NZ (Lys84 B)                               |
| N3 (G10)                      | 2.91                                   | 139                              | 3.28                                                | O (Leu232 A)                               |
| O4' (T12)                     | 3.21                                   | 161                              | 2.82                                                | N (Thr83 A)                                |
| N2 (G23)                      | 2.93                                   |                                  |                                                     |                                            |
| O6 (G25)                      | 2.76                                   |                                  |                                                     |                                            |
| OP1 (A11)                     | 2.70                                   | 188                              | 3.13                                                | N (Ser234 A)                               |
| OP1 (T12)                     | 2.70                                   | 194                              | 3.02                                                | OG (Ser234 A)                              |
| O2 (T24)                      | 3.02                                   | 248                              | 2.71                                                | OD1 (Asp35 A)                              |
| N3 (C24)                      | 2.66                                   |                                  |                                                     |                                            |
| OP1 (T12)                     | 2.44                                   | 282                              | 3.09                                                | N (Met14 A)                                |
| O6 (G25)                      | 2.63                                   | 344                              | 3.09                                                | O (Gly81 A)                                |
| OP1 (C18)                     | 3.09                                   | 354                              | 2.83                                                | O (Asn230 A)                               |
| OP2 (C18)                     | 3.17                                   |                                  |                                                     |                                            |

**Supplementary Table S6. Shape complementarity analysis among pLDH:DNA aptamer complexes with Sc software from the CCP4 suite of programs<sup>9</sup>.** Sc values are the quantitative shape complementarity indices between two surfaces. A maximum value of 1.0 shows perfect shape complementarity. The Sc values are independent on buried surface areas<sup>10</sup>. pL1:*Pv*LDH complex (PDB code: 5HRU) and 2008:*Pf*LDH complex (PDB code: 3ZH2) were used for Sc calculation. pLDHW indicates pLDH with bridging waters. pLDH shows pLDH without bridging waters. pLDHWwoFL presents that FL is not considered in pLDHW.

| Aptamer: | 2008a:        | pL1:          | 2008a:         | pL1:           | 2008a:             | pL1:               |
|----------|---------------|---------------|----------------|----------------|--------------------|--------------------|
| pLDH     | <i>Pf</i> LDH | <i>Pv</i> LDH | <i>Pf</i> LDHW | <i>Pv</i> LDHW | <i>Pf</i> LDHWwoFL | <i>Pv</i> LDHWwoFL |
| Sc       | 0.743         | 0.675         | 0.744          | 0.720          | 0.685              | 0.717              |

**Supplementary Table S7. Sequences of pL1 and its mutants.** The altered nucleotides from pL1 and underlined. Sequences of the G-G rich tem, loop 1, and loop 2 mutants are taken from previous mutation studies<sup>11</sup>.

| ssDNA                | Sequence (5' to 3')                                             |
|----------------------|-----------------------------------------------------------------|
| pL1                  | GTTCGATTGGATTGTGCCGGAAGTGCTGGCTCGAAC                            |
| G-C rich stem mutant | GTTCGATTGGATTGT <u>ACT</u> G <u>AA</u> AGTG <u>TCAG</u> TTCGAAC |
| Loop 1 mutant        | GTTCGAC <u>CAA</u> ATTGTGCCGGAAGTGCTGGCTCGAAC                   |
| Bulge mutant         | GTTCGATT <u>AA</u> ATTGTGCCGGAAGTGCTGGCTCGAAC                   |
| Loop 2 mutant        | GTTCGATTGGATTGTGCCG <u>GAGAC</u> GCTGGCTCGAAC                   |
| Hairpin mutant       | GTTCGATTGGATTGTGCCG <u>GAG</u> GTGCTGGCTCGAAC                   |

**Supplementary Table S8. B-factors for proteins and DNA aptamers in protein:DNA aptamer complexes.**

Average B-factors are taken from a previous analysis<sup>12-16</sup> or calculated with PyMol.

| Protein:<br>aptamer<br>(PDB code) | <i>Pv</i> LDH:<br>pL1<br>(5HRU) | <i>Pf</i> LDH:<br>2008a<br>(3ZH2) | thrombin:<br>mTBA<br>(3QLP) | thrombin:<br>TBA<br>(4DIH) | thrombin:<br>RE31<br>(5CMX) | ATX:<br>RB011<br>(5HRT) | VWF:<br>ARC1172<br>(3HXO) | HIV-1 RT:<br>atp-DNA<br>(5I3U) |
|-----------------------------------|---------------------------------|-----------------------------------|-----------------------------|----------------------------|-----------------------------|-------------------------|---------------------------|--------------------------------|
| B-factor (protein)                | 21.7                            | 25.7                              | 18.29                       | 25.6                       | 55.74                       | 38.3                    | 49.8                      | 102.0                          |
| B-factor (DNA)                    | 37.2                            | 36.5                              | 25.9                        | 38.0                       | 55.5                        | 53.2                    | 95.9                      | 117.0                          |

## References

- 1 Pintar, A., Carugo, O. & Pongor, S. CX, an algorithm that identifies protruding atoms in proteins. *Bioinformatics* **18**, 980-984 (2002).
- 2 Zuker, M. Mfold web server for nucleic acid folding and hybridization prediction. *Nucleic Acids Research* **31**, 3406-3415, doi:10.1093/nar/gkg595 (2003).
- 3 Zheng, H. *et al.* Validation of metal-binding sites in macromolecular structures with the CheckMyMetal web server. *Nature protocols* **9**, 156-170, doi:10.1038/nprot.2013.172 (2014).
- 4 Brown, I. D. Recent developments in the methods and applications of the bond valence model. *Chemical reviews* **109**, 6858-6919, doi:10.1021/cr900053k (2009).
- 5 Muller, P., Kopke, S. & Sheldrick, G. M. Is the bond-valence method able to identify metal atoms in protein structures? *Acta crystallographica. Section D, Biological crystallography* **59**, 32-37 (2003).
- 6 Kuppuraj, G., Dudev, M. & Lim, C. Factors governing metal-ligand distances and coordination geometries of metal complexes. *The journal of physical chemistry. B* **113**, 2952-2960, doi:10.1021/jp807972e (2009).
- 7 Jones, S., Daley, D. T., Luscombe, N. M., Berman, H. M. & Thornton, J. M. Protein-RNA interactions: a structural analysis. *Nucleic Acids Res* **29**, 943-954 (2001).
- 8 Barik, A. & Bahadur, R. P. Hydration of protein-RNA recognition sites. *Nucleic Acids Res* **42**, 10148-10160, doi:10.1093/nar/gku679 (2014).
- 9 Winn, M. D. *et al.* Overview of the CCP4 suite and current developments. *Acta crystallographica. Section D, Biological crystallography* **67**, 235-242, doi:10.1107/S0907444910045749 (2011).
- 10 Lawrence, M. C. & Colman, P. M. Shape complementarity at protein/protein interfaces. *J Mol Biol* **234**, 946-950, doi:10.1006/jmbi.1993.1648 (1993).
- 11 Lee, S. *et al.* A highly sensitive aptasensor towards Plasmodium lactate dehydrogenase for the diagnosis of malaria. *Biosens Bioelectron* **35**, 291-296, doi:10.1016/j.bios.2012.03.003 (2012).
- 12 Cheung, Y. W. *et al.* Structural basis for discriminatory recognition of Plasmodium lactate dehydrogenase by a DNA aptamer. *Proc Natl Acad Sci U S A* **110**, 15967-15972, doi:10.1073/pnas.1309538110 (2013).
- 13 Russo Krauss, I., Spiridonova, V., Pica, A., Napolitano, V. & Sica, F. Different duplex/quadruplex junctions determine the properties of anti-thrombin aptamers with mixed folding. *Nucleic Acids Res* **44**, 983-991, doi:10.1093/nar/gkv1384 (2016).
- 14 Kato, K. *et al.* Structural basis for specific inhibition of Autotaxin by a DNA aptamer. *Nature structural & molecular biology* **23**, 395-401, doi:10.1038/nsmb.3200 (2016).
- 15 Russo Krauss, I. *et al.* High-resolution structures of two complexes between thrombin and thrombin-binding aptamer shed light on the role of cations in the aptamer inhibitory activity. *Nucleic Acids Res* **40**, 8119-8128, doi:10.1093/nar/gks512 (2012).
- 16 Russo Krauss, I. *et al.* Thrombin-aptamer recognition: a revealed ambiguity. *Nucleic Acids Res* **39**, 7858-7867, doi:10.1093/nar/gkr522 (2011).
